# Supplementary material for: Synthesis, characterization of an AlPO-CJ2analogue containing heteroatomic Eu
Source: Royal Society of Chemistry journal article supplement (doi:10.1039/b205254g), 2002-01-01
Supplement: b205254g2.doc [file b205254g2.doc]

| A(X) | B(Y) | C(Y) | D(Y) | E(Y) | F(Y) | G(Y) | H(Y) | I(Y) | J(Y) | K(Y) | L(Y) |
| --- | --- | --- | --- | --- | --- | --- | --- | --- | --- | --- | --- |
| -9.3374 | 99.82544 | 99.79139 | 99.95412 | 99.98026 | 99.996 | 99.99973 | 99.99945 | 99.97035 | 99.9628 | 99.99864 | 99.94469 |
| -9.2632 | 99.56065 | 99.78809 | 99.95345 | 99.9799 | 99.99593 | 99.99972 | 99.99944 | 99.96992 | 99.96219 | 99.99861 | 99.94379 |
| -9.189 | 99.89448 | 99.78471 | 99.95274 | 99.97955 | 99.99584 | 99.99971 | 99.99944 | 99.96947 | 99.96156 | 99.99859 | 99.94286 |
| -9.1148 | 99.70345 | 99.78123 | 99.95203 | 99.97918 | 99.99574 | 99.99969 | 99.99942 | 99.96901 | 99.96091 | 99.99855 | 99.94191 |
| -9.0406 | 99.46135 | 99.77769 | 99.95129 | 99.97881 | 99.99566 | 99.99968 | 99.9994 | 99.96854 | 99.96025 | 99.99852 | 99.94094 |
| -8.9664 | 99.71291 | 99.77406 | 99.95055 | 99.97842 | 99.99557 | 99.99967 | 99.9994 | 99.96807 | 99.95958 | 99.99849 | 99.93994 |
| -8.8922 | 99.88313 | 99.77034 | 99.94979 | 99.97802 | 99.99547 | 99.99966 | 99.99939 | 99.96758 | 99.95889 | 99.99845 | 99.93892 |
| -8.818 | 100.095 | 99.76653 | 99.94901 | 99.97762 | 99.99537 | 99.99965 | 99.99938 | 99.96709 | 99.95818 | 99.99842 | 99.93787 |
| -8.7438 | 99.42825 | 99.76262 | 99.94821 | 99.9772 | 99.99527 | 99.99964 | 99.99937 | 99.96658 | 99.95744 | 99.99839 | 99.93681 |
| -8.6696 | 99.59375 | 99.75861 | 99.94739 | 99.97677 | 99.99517 | 99.99963 | 99.99937 | 99.96605 | 99.9567 | 99.99835 | 99.9357 |
| -8.5954 | 99.06038 | 99.75449 | 99.94656 | 99.97633 | 99.99506 | 99.99962 | 99.99936 | 99.96552 | 99.95593 | 99.99831 | 99.93457 |
| -8.5212 | 100.2245 | 99.75027 | 99.94569 | 99.97587 | 99.99495 | 99.9996 | 99.99934 | 99.96497 | 99.95514 | 99.99828 | 99.93341 |
| -8.447 | 100.2368 | 99.74594 | 99.94482 | 99.9754 | 99.99483 | 99.9996 | 99.99934 | 99.96442 | 99.95433 | 99.99824 | 99.93222 |
| -8.3728 | 99.41407 | 99.74149 | 99.94392 | 99.97492 | 99.99471 | 99.99958 | 99.99933 | 99.96384 | 99.9535 | 99.9982 | 99.931 |
| -8.2986 | 99.72425 | 99.73694 | 99.943 | 99.97443 | 99.99459 | 99.99957 | 99.99931 | 99.96326 | 99.95264 | 99.99815 | 99.92974 |
| -8.2244 | 99.85192 | 99.73225 | 99.94205 | 99.97392 | 99.99447 | 99.99955 | 99.99931 | 99.96265 | 99.95177 | 99.99812 | 99.92845 |
| -8.1502 | 100.1857 | 99.72744 | 99.94109 | 99.97339 | 99.99434 | 99.99953 | 99.9993 | 99.96204 | 99.95087 | 99.99807 | 99.92712 |
| -8.076 | 99.94743 | 99.7225 | 99.94009 | 99.97285 | 99.9942 | 99.99952 | 99.99928 | 99.96141 | 99.94994 | 99.99802 | 99.92576 |
| -8.0018 | 100.2756 | 99.71742 | 99.93908 | 99.97228 | 99.99406 | 99.9995 | 99.99928 | 99.96076 | 99.94898 | 99.99797 | 99.92435 |
| -7.9276 | 99.88691 | 99.7122 | 99.93803 | 99.97171 | 99.99391 | 99.99949 | 99.99927 | 99.9601 | 99.94801 | 99.99792 | 99.92291 |
| -7.8534 | 99.69683 | 99.70684 | 99.93697 | 99.97112 | 99.99376 | 99.99947 | 99.99925 | 99.95942 | 99.947 | 99.99787 | 99.92143 |
| -7.7792 | 100.2113 | 99.70132 | 99.93587 | 99.9705 | 99.99361 | 99.99945 | 99.99924 | 99.95872 | 99.94595 | 99.99782 | 99.91991 |
| -7.705 | 99.41974 | 99.69564 | 99.93474 | 99.96986 | 99.99343 | 99.99942 | 99.99922 | 99.958 | 99.94488 | 99.99776 | 99.91833 |
| -7.6308 | 99.66656 | 99.6898 | 99.93358 | 99.96922 | 99.99326 | 99.9994 | 99.99921 | 99.95727 | 99.94378 | 99.9977 | 99.91671 |
| -7.5566 | 100.0089 | 99.68378 | 99.9324 | 99.96854 | 99.99309 | 99.99937 | 99.9992 | 99.95651 | 99.94264 | 99.99764 | 99.91505 |
| -7.4824 | 99.83206 | 99.6776 | 99.93118 | 99.96784 | 99.9929 | 99.99935 | 99.99918 | 99.95574 | 99.94147 | 99.99758 | 99.91333 |
| -7.4082 | 99.50958 | 99.67123 | 99.92992 | 99.96712 | 99.99272 | 99.99933 | 99.99918 | 99.95495 | 99.94027 | 99.99751 | 99.91156 |
| -7.334 | 99.56821 | 99.66467 | 99.92863 | 99.96638 | 99.99252 | 99.99931 | 99.99916 | 99.95413 | 99.93903 | 99.99745 | 99.90974 |
| -7.2598 | 99.57484 | 99.6579 | 99.92731 | 99.96561 | 99.99232 | 99.99928 | 99.99915 | 99.95329 | 99.93774 | 99.99738 | 99.90786 |
| -7.1856 | 100.1177 | 99.65093 | 99.92596 | 99.96482 | 99.9921 | 99.99924 | 99.99913 | 99.95244 | 99.93642 | 99.99731 | 99.90592 |
| -7.1114 | 99.8661 | 99.64375 | 99.92456 | 99.964 | 99.99188 | 99.99921 | 99.99911 | 99.95155 | 99.93506 | 99.99723 | 99.90392 |
| -7.0372 | 99.27505 | 99.63632 | 99.92313 | 99.96314 | 99.99165 | 99.99918 | 99.9991 | 99.95065 | 99.93365 | 99.99715 | 99.90186 |
| -6.963 | 99.52471 | 99.62868 | 99.92165 | 99.96227 | 99.99141 | 99.99915 | 99.99909 | 99.94971 | 99.9322 | 99.99707 | 99.89973 |
| -6.8888 | 99.89259 | 99.62079 | 99.92013 | 99.96135 | 99.99116 | 99.99911 | 99.99908 | 99.94875 | 99.93069 | 99.99699 | 99.89754 |
| -6.8146 | 98.98567 | 99.61264 | 99.91856 | 99.9604 | 99.99089 | 99.99908 | 99.99906 | 99.94776 | 99.92915 | 99.9969 | 99.89526 |
| -6.7404 | 99.41879 | 99.60423 | 99.91695 | 99.95942 | 99.99062 | 99.99903 | 99.99904 | 99.94675 | 99.92754 | 99.99681 | 99.89292 |
| -6.6662 | 99.73277 | 99.59553 | 99.91529 | 99.9584 | 99.99033 | 99.99899 | 99.99902 | 99.94569 | 99.92588 | 99.99671 | 99.8905 |
| -6.592 | 99.55025 | 99.58654 | 99.91358 | 99.95735 | 99.99003 | 99.99895 | 99.99901 | 99.94462 | 99.92416 | 99.99661 | 99.88799 |
| -6.5178 | 99.32896 | 99.57724 | 99.91183 | 99.95625 | 99.98972 | 99.99889 | 99.99899 | 99.94351 | 99.92239 | 99.99651 | 99.88539 |
| -6.4436 | 99.66373 | 99.56763 | 99.91001 | 99.95512 | 99.98939 | 99.99884 | 99.99898 | 99.94237 | 99.92055 | 99.9964 | 99.88271 |
| -6.3694 | 99.39705 | 99.55769 | 99.90814 | 99.95393 | 99.98904 | 99.99879 | 99.99895 | 99.94118 | 99.91865 | 99.99628 | 99.87992 |
| -6.2952 | 99.276 | 99.54739 | 99.9062 | 99.95269 | 99.98868 | 99.99872 | 99.99893 | 99.93996 | 99.91666 | 99.99615 | 99.87704 |
| -6.221 | 99.66089 | 99.53673 | 99.90421 | 99.95142 | 99.9883 | 99.99866 | 99.99891 | 99.93871 | 99.91462 | 99.99603 | 99.87405 |
| -6.1468 | 99.746 | 99.52568 | 99.90216 | 99.95008 | 99.9879 | 99.99859 | 99.99889 | 99.93742 | 99.9125 | 99.9959 | 99.87096 |
| -6.0726 | 99.87745 | 99.51423 | 99.90004 | 99.94869 | 99.98748 | 99.99851 | 99.99887 | 99.93609 | 99.9103 | 99.99576 | 99.86776 |
| -5.9984 | 99.55875 | 99.50236 | 99.89785 | 99.94725 | 99.98705 | 99.99843 | 99.99886 | 99.93472 | 99.90802 | 99.99561 | 99.86443 |
| -5.9242 | 99.22493 | 99.49004 | 99.89559 | 99.94575 | 99.98658 | 99.99834 | 99.99883 | 99.93329 | 99.90565 | 99.99546 | 99.86098 |
| -5.85 | 99.75262 | 99.47725 | 99.89326 | 99.94418 | 99.98609 | 99.99825 | 99.99881 | 99.93182 | 99.90319 | 99.9953 | 99.8574 |
| -5.7758 | 99.36584 | 99.46397 | 99.89084 | 99.94254 | 99.98558 | 99.99815 | 99.99879 | 99.93031 | 99.90063 | 99.99513 | 99.85368 |
| -5.7016 | 99.78194 | 99.45018 | 99.88834 | 99.94083 | 99.98504 | 99.99805 | 99.99876 | 99.92874 | 99.89798 | 99.99495 | 99.84981 |
| -5.6274 | 99.33274 | 99.43584 | 99.88576 | 99.93905 | 99.98447 | 99.99793 | 99.99874 | 99.92712 | 99.89521 | 99.99477 | 99.84579 |
| -5.5532 | 99.276 | 99.42093 | 99.88309 | 99.93718 | 99.98386 | 99.9978 | 99.99872 | 99.92545 | 99.89233 | 99.99456 | 99.84161 |
| -5.479 | 99.29586 | 99.40541 | 99.88032 | 99.93523 | 99.98322 | 99.99767 | 99.9987 | 99.92372 | 99.88934 | 99.99435 | 99.83725 |
| -5.4048 | 99.7356 | 99.38925 | 99.87746 | 99.93318 | 99.98254 | 99.99752 | 99.99866 | 99.92193 | 99.88622 | 99.99413 | 99.83272 |
| -5.3306 | 99.69966 | 99.37242 | 99.87449 | 99.93105 | 99.98183 | 99.99736 | 99.99864 | 99.92007 | 99.88296 | 99.9939 | 99.828 |
| -5.2564 | 99.4623 | 99.35487 | 99.87141 | 99.9288 | 99.98106 | 99.99718 | 99.99861 | 99.91815 | 99.87956 | 99.99364 | 99.82307 |
| -5.1822 | 99.19467 | 99.33656 | 99.86822 | 99.92645 | 99.98026 | 99.99699 | 99.99859 | 99.91616 | 99.87602 | 99.99339 | 99.81793 |
| -5.108 | 99.30437 | 99.31746 | 99.86491 | 99.92399 | 99.97939 | 99.99678 | 99.99856 | 99.9141 | 99.87233 | 99.9931 | 99.81258 |
| -5.0338 | 99.31572 | 99.29752 | 99.86147 | 99.92139 | 99.97849 | 99.99655 | 99.99853 | 99.91196 | 99.86846 | 99.99281 | 99.80698 |
| -4.9596 | 99.0235 | 99.27666 | 99.85791 | 99.91867 | 99.97751 | 99.99631 | 99.9985 | 99.90974 | 99.86443 | 99.99249 | 99.80113 |
| -4.8854 | 99.44054 | 99.25484 | 99.8542 | 99.9158 | 99.97646 | 99.99603 | 99.99846 | 99.90742 | 99.86019 | 99.99215 | 99.79501 |
| -4.8112 | 99.49256 | 99.23203 | 99.85035 | 99.91279 | 99.97535 | 99.99573 | 99.99843 | 99.90503 | 99.85577 | 99.99179 | 99.78862 |
| -4.737 | 99.79896 | 99.20813 | 99.84635 | 99.90961 | 99.97416 | 99.99541 | 99.9984 | 99.90254 | 99.85114 | 99.9914 | 99.78193 |
| -4.6628 | 98.97338 | 99.18308 | 99.84219 | 99.90626 | 99.97289 | 99.99505 | 99.99836 | 99.89996 | 99.84628 | 99.991 | 99.77492 |
| -4.5886 | 98.91286 | 99.15682 | 99.83786 | 99.90273 | 99.97153 | 99.99467 | 99.99833 | 99.89727 | 99.84119 | 99.99055 | 99.76757 |
| -4.5144 | 99.16724 | 99.12926 | 99.83335 | 99.89899 | 99.97006 | 99.99425 | 99.99829 | 99.89448 | 99.83585 | 99.99009 | 99.75986 |
| -4.4402 | 99.0008 | 99.1003 | 99.82865 | 99.89505 | 99.96849 | 99.9938 | 99.99825 | 99.89157 | 99.83024 | 99.98959 | 99.75178 |
| -4.366 | 98.28208 | 99.06988 | 99.82375 | 99.89088 | 99.9668 | 99.99332 | 99.99821 | 99.88854 | 99.82434 | 99.98904 | 99.74329 |
| -4.2918 | 98.35301 | 99.03788 | 99.81865 | 99.88645 | 99.96497 | 99.99281 | 99.99818 | 99.88538 | 99.81813 | 99.98846 | 99.73435 |
| -4.2176 | 99.04998 | 99.0042 | 99.81332 | 99.88177 | 99.96301 | 99.99226 | 99.99814 | 99.88209 | 99.8116 | 99.98784 | 99.72496 |
| -4.1434 | 98.99229 | 98.96873 | 99.80776 | 99.87679 | 99.96088 | 99.99171 | 99.99809 | 99.87865 | 99.80472 | 99.98717 | 99.71507 |
| -4.0692 | 99.04147 | 98.93137 | 99.80195 | 99.87151 | 99.95858 | 99.99113 | 99.99805 | 99.87508 | 99.79745 | 99.98643 | 99.70464 |
| -3.995 | 99.19278 | 98.89195 | 99.79587 | 99.86589 | 99.95609 | 99.99057 | 99.998 | 99.87133 | 99.78979 | 99.98565 | 99.69365 |
| -3.9208 | 99.20791 | 98.85037 | 99.78951 | 99.8599 | 99.95338 | 99.99002 | 99.99796 | 99.86742 | 99.7817 | 99.98479 | 99.68205 |
| -3.8466 | 98.77951 | 98.80648 | 99.78287 | 99.85352 | 99.95044 | 99.98952 | 99.99791 | 99.86333 | 99.77315 | 99.98387 | 99.66979 |
| -3.7724 | 98.96865 | 98.76012 | 99.77589 | 99.84672 | 99.94724 | 99.98907 | 99.99786 | 99.85905 | 99.76408 | 99.98287 | 99.65683 |
| -3.6982 | 99.25047 | 98.7111 | 99.76859 | 99.83945 | 99.94376 | 99.98872 | 99.9978 | 99.85458 | 99.75449 | 99.98178 | 99.64312 |
| -3.624 | 98.38516 | 98.65923 | 99.76094 | 99.83167 | 99.93996 | 99.98846 | 99.99775 | 99.84988 | 99.74432 | 99.98059 | 99.62859 |
| -3.5498 | 98.8476 | 98.60429 | 99.7529 | 99.82334 | 99.93581 | 99.98833 | 99.9977 | 99.84497 | 99.73352 | 99.9793 | 99.61317 |
| -3.4756 | 98.34923 | 98.54604 | 99.74446 | 99.81441 | 99.93129 | 99.98833 | 99.99763 | 99.83981 | 99.72205 | 99.97789 | 99.59682 |
| -3.4014 | 98.64806 | 98.48416 | 99.73558 | 99.8048 | 99.92633 | 99.98846 | 99.99757 | 99.83439 | 99.70983 | 99.97634 | 99.57942 |
| -3.3272 | 98.75965 | 98.41837 | 99.72625 | 99.79449 | 99.92093 | 99.98871 | 99.99751 | 99.8287 | 99.69683 | 99.97466 | 99.56093 |
| -3.253 | 97.98703 | 98.34829 | 99.71642 | 99.78339 | 99.91503 | 99.98906 | 99.99744 | 99.82272 | 99.68298 | 99.97282 | 99.54123 |
| -3.1788 | 98.57525 | 98.27354 | 99.70607 | 99.77141 | 99.90859 | 99.98951 | 99.99738 | 99.81642 | 99.66818 | 99.97082 | 99.52023 |
| -3.1046 | 98.90907 | 98.19371 | 99.69515 | 99.75848 | 99.90157 | 99.99001 | 99.99731 | 99.80979 | 99.65237 | 99.96863 | 99.49781 |
| -3.0304 | 98.39935 | 98.10833 | 99.68363 | 99.74451 | 99.89394 | 99.99056 | 99.99723 | 99.8028 | 99.63546 | 99.96623 | 99.47385 |
| -2.9562 | 98.23386 | 98.01692 | 99.67146 | 99.72938 | 99.88568 | 99.99113 | 99.99715 | 99.79543 | 99.61733 | 99.96363 | 99.44821 |
| -2.882 | 97.65321 | 97.919 | 99.6586 | 99.71298 | 99.87678 | 99.99169 | 99.99708 | 99.78766 | 99.5979 | 99.96081 | 99.42075 |
| -2.8078 | 97.64564 | 97.81403 | 99.64498 | 99.69518 | 99.86723 | 99.99226 | 99.99699 | 99.77944 | 99.57702 | 99.95775 | 99.39128 |
| -2.7336 | 97.84045 | 97.70148 | 99.63056 | 99.67583 | 99.8571 | 99.9928 | 99.99691 | 99.77074 | 99.55457 | 99.95446 | 99.35963 |
| -2.6594 | 97.40922 | 97.58082 | 99.61526 | 99.65477 | 99.84647 | 99.99331 | 99.99682 | 99.76154 | 99.53038 | 99.95095 | 99.32558 |
| -2.5852 | 97.87733 | 97.45148 | 99.59903 | 99.63182 | 99.83546 | 99.99379 | 99.99673 | 99.75179 | 99.5043 | 99.94724 | 99.28891 |
| -2.511 | 97.57661 | 97.31295 | 99.58178 | 99.6068 | 99.82429 | 99.99424 | 99.99663 | 99.74145 | 99.47614 | 99.94336 | 99.24936 |
| -2.4368 | 96.92786 | 97.1647 | 99.56344 | 99.57949 | 99.81322 | 99.99466 | 99.99653 | 99.73046 | 99.44569 | 99.93937 | 99.20665 |
| -2.3626 | 97.04324 | 97.00623 | 99.5439 | 99.54967 | 99.8026 | 99.99504 | 99.99642 | 99.71879 | 99.4127 | 99.93535 | 99.16045 |
| -2.2884 | 96.98839 | 96.83702 | 99.52307 | 99.51707 | 99.79282 | 99.9954 | 99.99631 | 99.70636 | 99.37694 | 99.93141 | 99.11042 |
| -2.2142 | 96.62997 | 96.65652 | 99.50084 | 99.48148 | 99.78435 | 99.99572 | 99.99619 | 99.69313 | 99.33811 | 99.92769 | 99.05617 |
| -2.14 | 96.91273 | 96.46411 | 99.47708 | 99.44259 | 99.7776 | 99.99602 | 99.99607 | 99.67901 | 99.29589 | 99.92432 | 98.99725 |
| -2.0658 | 96.45692 | 96.25902 | 99.45167 | 99.40018 | 99.77299 | 99.99629 | 99.99594 | 99.66394 | 99.24994 | 99.92149 | 98.93319 |
| -1.9916 | 96.525 | 96.04028 | 99.42444 | 99.35398 | 99.77078 | 99.99654 | 99.9958 | 99.64782 | 99.19985 | 99.91932 | 98.86344 |
| -1.9174 | 95.84884 | 95.80667 | 99.39523 | 99.30382 | 99.77114 | 99.99676 | 99.99567 | 99.63058 | 99.14523 | 99.91797 | 98.78745 |
| -1.8432 | 95.67389 | 95.55672 | 99.36387 | 99.24955 | 99.77404 | 99.99697 | 99.99551 | 99.61209 | 99.08559 | 99.91751 | 98.70454 |
| -1.769 | 95.2871 | 95.2887 | 99.33014 | 99.19115 | 99.77929 | 99.99716 | 99.99536 | 99.59226 | 99.02046 | 99.91798 | 98.61404 |
| -1.6948 | 94.9041 | 95.00072 | 99.29382 | 99.12874 | 99.78656 | 99.99734 | 99.9952 | 99.57095 | 98.9493 | 99.91935 | 98.51518 |
| -1.6206 | 94.45679 | 94.69084 | 99.25465 | 99.06268 | 99.79545 | 99.9975 | 99.99503 | 99.54802 | 98.87154 | 99.92152 | 98.40717 |
| -1.5464 | 94.22132 | 94.35728 | 99.21235 | 98.99361 | 99.8055 | 99.99765 | 99.99485 | 99.52332 | 98.78666 | 99.92436 | 98.28916 |
| -1.4722 | 94.17309 | 93.9985 | 99.16661 | 98.92251 | 99.81629 | 99.99778 | 99.99466 | 99.49666 | 98.69408 | 99.92773 | 98.16032 |
| -1.398 | 93.45437 | 93.61349 | 99.11708 | 98.85081 | 99.82742 | 99.99791 | 99.99445 | 99.46786 | 98.59332 | 99.93147 | 98.01984 |
| -1.3238 | 93.13851 | 93.20184 | 99.06338 | 98.78039 | 99.83857 | 99.99802 | 99.99425 | 99.43671 | 98.48396 | 99.9354 | 97.86695 |
| -1.2496 | 92.34886 | 92.76393 | 99.00507 | 98.71358 | 99.84949 | 99.99813 | 99.99402 | 99.40296 | 98.36576 | 99.93942 | 97.70107 |
| -1.1754 | 92.70255 | 92.30103 | 98.94169 | 98.65307 | 99.86 | 99.99823 | 99.99378 | 99.36635 | 98.23872 | 99.94341 | 97.52183 |
| -1.1012 | 91.97532 | 91.8153 | 98.8727 | 98.60173 | 99.86997 | 99.99832 | 99.99354 | 99.32658 | 98.10323 | 99.94729 | 97.32929 |
| -1.027 | 91.09205 | 91.30987 | 98.79752 | 98.56233 | 99.87933 | 99.99841 | 99.99327 | 99.28333 | 97.96012 | 99.951 | 97.12403 |
| -0.9528 | 90.51802 | 90.7888 | 98.71553 | 98.53722 | 99.88806 | 99.99849 | 99.99299 | 99.23623 | 97.81091 | 99.95451 | 96.90742 |
| -0.8786 | 89.72648 | 90.25716 | 98.62601 | 98.52802 | 99.89614 | 99.99857 | 99.99269 | 99.18489 | 97.65792 | 99.95779 | 96.6818 |
| -0.8044 | 89.45791 | 89.72111 | 98.52825 | 98.53532 | 99.90359 | 99.99863 | 99.99237 | 99.12888 | 97.50439 | 99.96085 | 96.45076 |
| -0.7302 | 88.86402 | 89.18806 | 98.42142 | 98.55864 | 99.91045 | 99.9987 | 99.99203 | 99.06772 | 97.35457 | 99.96367 | 96.2193 |
| -0.656 | 89.30754 | 88.66677 | 98.30473 | 98.59648 | 99.91673 | 99.99876 | 99.99167 | 99.00091 | 97.21363 | 99.96626 | 95.99392 |
| -0.5818 | 87.84835 | 88.16726 | 98.17728 | 98.64657 | 99.92249 | 99.9988 | 99.99128 | 98.92789 | 97.08745 | 99.96864 | 95.78251 |
| -0.5076 | 87.84552 | 87.70041 | 98.03831 | 98.70615 | 99.92775 | 99.99886 | 99.99087 | 98.84815 | 96.9822 | 99.97083 | 95.59402 |
| -0.4334 | 87.36417 | 87.27701 | 97.88702 | 98.77238 | 99.93258 | 99.99891 | 99.99043 | 98.76111 | 96.90371 | 99.97284 | 95.43772 |
| -0.3592 | 87.07951 | 86.90652 | 97.72279 | 98.84251 | 99.93699 | 99.99895 | 99.98996 | 98.66623 | 96.85672 | 99.97467 | 95.32233 |
| -0.285 | 87.31593 | 86.59562 | 97.54526 | 98.91416 | 99.94103 | 99.99899 | 99.98946 | 98.56304 | 96.84428 | 99.97635 | 95.25489 |
| -0.2108 | 86.48752 | 86.34698 | 97.35439 | 98.98541 | 99.94474 | 99.99904 | 99.98891 | 98.45117 | 96.8672 | 99.97789 | 95.23975 |
| -0.1366 | 86.1499 | 86.15878 | 97.15071 | 99.05479 | 99.94814 | 99.99908 | 99.98833 | 98.33044 | 96.92398 | 99.9793 | 95.27793 |
| -0.0624 | 85.98158 | 86.02495 | 96.93546 | 99.12123 | 99.95126 | 99.99911 | 99.98771 | 98.20097 | 97.011 | 99.98059 | 95.36691 |
| 0.0118 | 85.8539 | 85.93654 | 96.71088 | 99.18408 | 99.95414 | 99.99915 | 99.98703 | 98.06322 | 97.12312 | 99.98177 | 95.50105 |
| 0.086 | 85.65342 | 85.88349 | 96.48038 | 99.24296 | 99.95678 | 99.99918 | 99.98631 | 97.91827 | 97.25433 | 99.98286 | 95.67245 |
| 0.1602 | 85.57209 | 85.85674 | 96.24879 | 99.29771 | 99.95922 | 99.99921 | 99.98552 | 97.76782 | 97.39851 | 99.98386 | 95.87203 |
| 0.2344 | 84.99428 | 85.85004 | 96.02242 | 99.34834 | 99.96147 | 99.99924 | 99.98466 | 97.61447 | 97.54993 | 99.98479 | 96.09055 |
| 0.3086 | 86.4582 | 85.86115 | 95.80902 | 99.39499 | 99.96355 | 99.99927 | 99.98374 | 97.46175 | 97.7037 | 99.98564 | 96.31947 |
| 0.3828 | 86.28609 | 85.89227 | 95.61741 | 99.43783 | 99.96548 | 99.99929 | 99.98274 | 97.31421 | 97.85586 | 99.98643 | 96.55145 |
| 0.457 | 85.83688 | 85.94955 | 95.45689 | 99.47711 | 99.96726 | 99.99931 | 99.98166 | 97.17725 | 98.00346 | 99.98715 | 96.78066 |
| 0.5312 | 85.59479 | 86.04188 | 95.33628 | 99.51308 | 99.96893 | 99.99934 | 99.98048 | 97.05688 | 98.14442 | 99.98782 | 97.00274 |
| 0.6054 | 86.64072 | 86.17904 | 95.26287 | 99.54601 | 99.97046 | 99.99936 | 99.97919 | 96.95924 | 98.27747 | 99.98845 | 97.21465 |
| 0.6796 | 86.31729 | 86.36974 | 95.24139 | 99.57614 | 99.97189 | 99.99938 | 99.97778 | 96.8899 | 98.40189 | 99.98903 | 97.4145 |
| 0.7538 | 87.32729 | 86.61983 | 95.27326 | 99.60374 | 99.97324 | 99.9994 | 99.97625 | 96.85314 | 98.51743 | 99.98957 | 97.6013 |
| 0.828 | 86.47049 | 86.93118 | 95.35637 | 99.62901 | 99.97447 | 99.99941 | 99.97457 | 96.85138 | 98.62419 | 99.99007 | 97.7747 |
| 0.9022 | 87.36511 | 87.30129 | 95.48544 | 99.65218 | 99.97564 | 99.99944 | 99.97275 | 96.88473 | 98.72247 | 99.99053 | 97.93489 |
| 0.9764 | 87.30175 | 87.72385 | 95.65276 | 99.67345 | 99.97673 | 99.99945 | 99.97075 | 96.951 | 98.81271 | 99.99097 | 98.08231 |
| 1.0506 | 88.30984 | 88.18983 | 95.84937 | 99.69299 | 99.97775 | 99.99947 | 99.96857 | 97.04607 | 98.89541 | 99.99138 | 98.21764 |
| 1.1248 | 88.56235 | 88.68881 | 96.06598 | 99.71096 | 99.97871 | 99.99948 | 99.96619 | 97.16444 | 98.97114 | 99.99176 | 98.34167 |
| 1.199 | 89.01817 | 89.21014 | 96.29394 | 99.72752 | 99.97961 | 99.9995 | 99.96359 | 97.30003 | 99.04045 | 99.99213 | 98.45523 |
| 1.2732 | 90.34496 | 89.74386 | 96.52577 | 99.74279 | 99.98045 | 99.99951 | 99.96077 | 97.44678 | 99.10389 | 99.99246 | 98.55917 |
| 1.3474 | 91.09962 | 90.28105 | 96.75545 | 99.75689 | 99.98125 | 99.99953 | 99.95772 | 97.59921 | 99.16198 | 99.99277 | 98.6543 |
| 1.4216 | 90.99748 | 90.81408 | 96.97842 | 99.76994 | 99.98199 | 99.99954 | 99.95442 | 97.75266 | 99.2152 | 99.99307 | 98.74142 |
| 1.4958 | 90.83482 | 91.33647 | 97.19154 | 99.78201 | 99.9827 | 99.99956 | 99.9509 | 97.90353 | 99.26402 | 99.99335 | 98.82124 |
| 1.57 | 92.00936 | 91.8429 | 97.39279 | 99.79322 | 99.98337 | 99.99957 | 99.94714 | 98.04913 | 99.30882 | 99.99361 | 98.89444 |
| 1.6442 | 92.58434 | 92.32909 | 97.58107 | 99.80362 | 99.98399 | 99.99958 | 99.94321 | 98.18764 | 99.34999 | 99.99387 | 98.96165 |
| 1.7184 | 93.00139 | 92.79185 | 97.75598 | 99.81329 | 99.98459 | 99.99959 | 99.93913 | 98.31797 | 99.38788 | 99.99409 | 99.02341 |
| 1.7926 | 92.82832 | 93.22901 | 97.91763 | 99.8223 | 99.98515 | 99.9996 | 99.93499 | 98.43958 | 99.42278 | 99.99432 | 99.08025 |
| 1.8668 | 93.80238 | 93.63937 | 98.06646 | 99.8307 | 99.98569 | 99.99961 | 99.93089 | 98.55231 | 99.45499 | 99.99453 | 99.13261 |
| 1.941 | 93.75226 | 94.02269 | 98.20312 | 99.83854 | 99.98619 | 99.99962 | 99.92694 | 98.65636 | 99.48473 | 99.99473 | 99.18094 |
| 2.0152 | 94.21754 | 94.3795 | 98.32838 | 99.84587 | 99.98667 | 99.99963 | 99.9233 | 98.75204 | 99.51226 | 99.99492 | 99.22558 |
| 2.0894 | 94.3679 | 94.71098 | 98.44308 | 99.85273 | 99.98713 | 99.99964 | 99.92014 | 98.83984 | 99.53775 | 99.99509 | 99.26688 |
| 2.1636 | 94.38303 | 95.01878 | 98.54807 | 99.85915 | 99.98756 | 99.99965 | 99.91762 | 98.92028 | 99.5614 | 99.99526 | 99.30515 |
| 2.2378 | 95.11688 | 95.30479 | 98.64415 | 99.86517 | 99.98797 | 99.99965 | 99.91587 | 98.99392 | 99.58337 | 99.99541 | 99.34064 |
| 2.312 | 95.57648 | 95.57106 | 98.73213 | 99.87083 | 99.98836 | 99.99966 | 99.91502 | 99.06133 | 99.60381 | 99.99557 | 99.37362 |
| 2.3862 | 95.43085 | 95.81948 | 98.81274 | 99.87616 | 99.98873 | 99.99966 | 99.91512 | 99.12302 | 99.62283 | 99.99572 | 99.4043 |
| 2.4604 | 96.01907 | 96.0518 | 98.88666 | 99.88116 | 99.98909 | 99.99967 | 99.91617 | 99.17953 | 99.64059 | 99.99586 | 99.43288 |
| 2.5346 | 96.68293 | 96.26946 | 98.95451 | 99.88589 | 99.98943 | 99.99968 | 99.91808 | 99.23131 | 99.65716 | 99.99599 | 99.45953 |
| 2.6088 | 96.52216 | 96.47369 | 99.01685 | 99.89034 | 99.98975 | 99.99969 | 99.92076 | 99.27881 | 99.67266 | 99.99612 | 99.48442 |
| 2.683 | 96.28669 | 96.66537 | 99.07422 | 99.89454 | 99.99007 | 99.99969 | 99.92403 | 99.32243 | 99.68716 | 99.99623 | 99.5077 |
| 2.7572 | 96.5912 | 96.84528 | 99.12708 | 99.89851 | 99.99036 | 99.9997 | 99.92775 | 99.36253 | 99.70076 | 99.99635 | 99.52949 |
| 2.8314 | 97.17753 | 97.01395 | 99.17583 | 99.90227 | 99.99065 | 99.99971 | 99.93175 | 99.39944 | 99.71352 | 99.99646 | 99.5499 |
| 2.9056 | 97.535 | 97.17194 | 99.22086 | 99.90582 | 99.99091 | 99.99972 | 99.93587 | 99.43346 | 99.7255 | 99.99656 | 99.56907 |
| 2.9798 | 97.70805 | 97.31976 | 99.26253 | 99.90919 | 99.99117 | 99.99972 | 99.94 | 99.46486 | 99.73677 | 99.99667 | 99.58707 |
| 3.054 | 97.3364 | 97.45787 | 99.30112 | 99.91239 | 99.99142 | 99.99973 | 99.94405 | 99.49387 | 99.74738 | 99.99676 | 99.604 |
| 3.1282 | 97.95299 | 97.58681 | 99.33691 | 99.91542 | 99.99166 | 99.99973 | 99.94795 | 99.52074 | 99.75737 | 99.99685 | 99.61994 |
| 3.2024 | 97.51892 | 97.7071 | 99.37017 | 99.9183 | 99.99189 | 99.99974 | 99.95166 | 99.54562 | 99.7668 | 99.99694 | 99.63496 |
| 3.2766 | 97.83856 | 97.81929 | 99.40109 | 99.92104 | 99.99211 | 99.99974 | 99.95514 | 99.56873 | 99.7757 | 99.99702 | 99.64913 |
| 3.3508 | 98.05796 | 97.92392 | 99.42989 | 99.92365 | 99.99232 | 99.99975 | 99.95838 | 99.59019 | 99.78412 | 99.9971 | 99.66251 |
| 3.425 | 98.58659 | 98.02153 | 99.45676 | 99.92612 | 99.99252 | 99.99976 | 99.96139 | 99.61016 | 99.79208 | 99.99718 | 99.67516 |
| 3.4992 | 97.90286 | 98.11265 | 99.48183 | 99.92849 | 99.99272 | 99.99976 | 99.96416 | 99.62878 | 99.79962 | 99.99725 | 99.68713 |
| 3.5734 | 97.81397 | 98.19777 | 99.50528 | 99.93075 | 99.9929 | 99.99976 | 99.96671 | 99.64614 | 99.80677 | 99.99733 | 99.69846 |
| 3.6476 | 98.22629 | 98.27737 | 99.52722 | 99.93289 | 99.99308 | 99.99976 | 99.96903 | 99.66235 | 99.81354 | 99.99739 | 99.70919 |
| 3.7218 | 98.33221 | 98.3519 | 99.54778 | 99.93494 | 99.99326 | 99.99976 | 99.97118 | 99.67752 | 99.81997 | 99.99746 | 99.71938 |
| 3.796 | 98.39084 | 98.42178 | 99.56709 | 99.9369 | 99.99342 | 99.99977 | 99.97313 | 99.69173 | 99.82608 | 99.99752 | 99.72905 |
| 3.8702 | 98.3445 | 98.48741 | 99.58521 | 99.93878 | 99.99358 | 99.99977 | 99.97492 | 99.70505 | 99.83189 | 99.99758 | 99.73824 |
| 3.9444 | 99.09821 | 98.54913 | 99.60225 | 99.94057 | 99.99374 | 99.99978 | 99.97657 | 99.71755 | 99.83743 | 99.99764 | 99.74698 |
| 4.0186 | 98.24047 | 98.60725 | 99.61829 | 99.94229 | 99.99389 | 99.99978 | 99.97807 | 99.72929 | 99.84269 | 99.9977 | 99.75529 |
| 4.0928 | 98.45987 | 98.66206 | 99.63342 | 99.94394 | 99.99403 | 99.99979 | 99.97945 | 99.74035 | 99.84771 | 99.99776 | 99.76321 |
| 4.167 | 98.70386 | 98.71381 | 99.64767 | 99.94552 | 99.99417 | 99.99979 | 99.98071 | 99.75076 | 99.8525 | 99.99781 | 99.77076 |
| 4.2412 | 98.4211 | 98.76271 | 99.66114 | 99.94703 | 99.99431 | 99.99979 | 99.98187 | 99.76056 | 99.85706 | 99.99786 | 99.77796 |
| 4.3154 | 99.27127 | 98.80896 | 99.67387 | 99.94848 | 99.99444 | 99.99979 | 99.98294 | 99.76982 | 99.86143 | 99.99791 | 99.78483 |
| 4.3896 | 98.61024 | 98.85275 | 99.68591 | 99.94987 | 99.99456 | 99.99979 | 99.98392 | 99.77856 | 99.86559 | 99.99796 | 99.79139 |
| 4.4638 | 98.97622 | 98.89421 | 99.6973 | 99.95121 | 99.99468 | 99.9998 | 99.98483 | 99.78683 | 99.86958 | 99.998 | 99.79766 |
| 4.538 | 98.25845 | 98.93351 | 99.70811 | 99.95249 | 99.9948 | 99.9998 | 99.98567 | 99.79465 | 99.87339 | 99.99805 | 99.80365 |
| 4.6122 | 99.1871 | 98.97078 | 99.71835 | 99.95373 | 99.99491 | 99.99981 | 99.98644 | 99.80206 | 99.87704 | 99.99809 | 99.80939 |
| 4.6864 | 98.9469 | 99.00614 | 99.72807 | 99.95492 | 99.99503 | 99.99981 | 99.98716 | 99.80907 | 99.88054 | 99.99813 | 99.81488 |
| 4.7606 | 98.99891 | 99.03973 | 99.73732 | 99.95606 | 99.99513 | 99.99982 | 99.98782 | 99.81574 | 99.88389 | 99.99817 | 99.82014 |
| 4.8348 | 98.45798 | 99.07162 | 99.7461 | 99.95716 | 99.99523 | 99.99982 | 99.98843 | 99.82207 | 99.88711 | 99.99821 | 99.82518 |
| 4.909 | 98.74074 | 99.10197 | 99.75446 | 99.95822 | 99.99533 | 99.99982 | 99.98901 | 99.82808 | 99.89019 | 99.99825 | 99.83002 |
| 4.9832 | 99.13509 | 99.13084 | 99.76242 | 99.95924 | 99.99543 | 99.99982 | 99.98954 | 99.83379 | 99.89315 | 99.99828 | 99.83466 |
| 5.0574 | 99.37435 | 99.15832 | 99.77001 | 99.96023 | 99.99552 | 99.99982 | 99.99004 | 99.83924 | 99.896 | 99.99832 | 99.83911 |
| 5.1316 | 98.60551 | 99.1845 | 99.77724 | 99.96117 | 99.99561 | 99.99982 | 99.99049 | 99.84441 | 99.89872 | 99.99834 | 99.84338 |
| 5.2058 | 99.54362 | 99.20947 | 99.78414 | 99.96209 | 99.9957 | 99.99982 | 99.99093 | 99.84936 | 99.90134 | 99.99838 | 99.8475 |
| 5.28 | 99.51715 | 99.2333 | 99.79073 | 99.96297 | 99.99578 | 99.99982 | 99.99133 | 99.85407 | 99.90388 | 99.99841 | 99.85145 |
| 5.3542 | 99.21737 | 99.25607 | 99.79703 | 99.96383 | 99.99586 | 99.99982 | 99.99171 | 99.85857 | 99.90631 | 99.99844 | 99.85525 |
| 5.4284 | 99.60415 | 99.27781 | 99.80305 | 99.96465 | 99.99594 | 99.99983 | 99.99207 | 99.86286 | 99.90865 | 99.99847 | 99.85891 |
| 5.5026 | 98.83909 | 99.29861 | 99.80882 | 99.96545 | 99.99603 | 99.99983 | 99.9924 | 99.86697 | 99.9109 | 99.9985 | 99.86243 |
| 5.5768 | 99.61456 | 99.31851 | 99.81433 | 99.96622 | 99.9961 | 99.99983 | 99.99271 | 99.8709 | 99.91309 | 99.99854 | 99.86583 |
| 5.651 | 99.66562 | 99.33756 | 99.81962 | 99.96697 | 99.99617 | 99.99983 | 99.99301 | 99.87466 | 99.91518 | 99.99856 | 99.8691 |
| 5.7252 | 99.3299 | 99.35582 | 99.82468 | 99.9677 | 99.99625 | 99.99984 | 99.99329 | 99.87826 | 99.9172 | 99.99859 | 99.87226 |
| 5.7994 | 99.36395 | 99.37333 | 99.82954 | 99.96839 | 99.99632 | 99.99984 | 99.99355 | 99.88171 | 99.91915 | 99.99861 | 99.87531 |
| 5.8736 | 99.67508 | 99.39012 | 99.8342 | 99.96907 | 99.99638 | 99.99984 | 99.9938 | 99.88501 | 99.92104 | 99.99864 | 99.87824 |
| 5.9478 | 98.9242 | 99.40623 | 99.83867 | 99.96973 | 99.99644 | 99.99985 | 99.99403 | 99.88818 | 99.92286 | 99.99866 | 99.88107 |
| 6.022 | 99.19183 | 99.42172 | 99.84296 | 99.97036 | 99.99651 | 99.99985 | 99.99426 | 99.89122 | 99.92461 | 99.99869 | 99.88381 |
| 6.0962 | 98.75304 | 99.4366 | 99.8471 | 99.97097 | 99.99657 | 99.99985 | 99.99446 | 99.89414 | 99.92632 | 99.99871 | 99.88646 |
| 6.1704 | 99.5266 | 99.4509 | 99.85107 | 99.97157 | 99.99664 | 99.99985 | 99.99466 | 99.89695 | 99.92796 | 99.99873 | 99.88902 |
| 6.2446 | 99.37719 | 99.46467 | 99.85489 | 99.97215 | 99.9967 | 99.99986 | 99.99485 | 99.89965 | 99.92954 | 99.99876 | 99.89149 |
| 6.3188 | 99.19089 | 99.47791 | 99.85856 | 99.97271 | 99.99675 | 99.99986 | 99.99503 | 99.90224 | 99.93108 | 99.99878 | 99.89388 |
| 6.393 | 99.34598 | 99.49068 | 99.8621 | 99.97325 | 99.99681 | 99.99986 | 99.99519 | 99.90474 | 99.93257 | 99.9988 | 99.89619 |
| 6.4672 | 99.2533 | 99.50297 | 99.86551 | 99.97378 | 99.99686 | 99.99986 | 99.99536 | 99.90714 | 99.93401 | 99.99882 | 99.89843 |
| 6.5414 | 99.57861 | 99.51481 | 99.86879 | 99.97428 | 99.99691 | 99.99985 | 99.99551 | 99.90945 | 99.93539 | 99.99883 | 99.9006 |
| 6.6156 | 99.6694 | 99.52624 | 99.87196 | 99.97478 | 99.99696 | 99.99986 | 99.99565 | 99.91167 | 99.93674 | 99.99886 | 99.90269 |
| 6.6898 | 99.04998 | 99.53725 | 99.87501 | 99.97527 | 99.99701 | 99.99986 | 99.99579 | 99.91382 | 99.93806 | 99.99887 | 99.90472 |
| 6.764 | 99.19467 | 99.5479 | 99.87796 | 99.97573 | 99.99706 | 99.99986 | 99.99592 | 99.91589 | 99.93932 | 99.99889 | 99.9067 |
| 6.8382 | 99.42068 | 99.55817 | 99.88081 | 99.97619 | 99.99711 | 99.99986 | 99.99605 | 99.91789 | 99.94056 | 99.99891 | 99.90861 |
| 6.9124 | 99.53512 | 99.5681 | 99.88355 | 99.97663 | 99.99715 | 99.99986 | 99.99617 | 99.91982 | 99.94175 | 99.99892 | 99.91046 |
| 6.9866 | 99.90298 | 99.57769 | 99.88621 | 99.97707 | 99.9972 | 99.99986 | 99.99628 | 99.92168 | 99.94291 | 99.99894 | 99.91226 |
| 7.0608 | 99.22777 | 99.58697 | 99.88877 | 99.97749 | 99.99725 | 99.99986 | 99.99639 | 99.92348 | 99.94403 | 99.99896 | 99.91401 |
| 7.135 | 99.53795 | 99.59594 | 99.89125 | 99.97789 | 99.99729 | 99.99986 | 99.9965 | 99.92522 | 99.94513 | 99.99898 | 99.9157 |
| 7.2092 | 100.2671 | 99.60462 | 99.89365 | 99.97829 | 99.99733 | 99.99986 | 99.9966 | 99.9269 | 99.94619 | 99.99899 | 99.91734 |
| 7.2834 | 98.71332 | 99.61302 | 99.89597 | 99.97868 | 99.99738 | 99.99986 | 99.9967 | 99.92852 | 99.94722 | 99.99901 | 99.91894 |
| 7.3576 | 99.74127 | 99.62115 | 99.89822 | 99.97906 | 99.99741 | 99.99987 | 99.99679 | 99.93009 | 99.94822 | 99.99902 | 99.92049 |
| 7.4318 | 99.53701 | 99.62904 | 99.90039 | 99.97942 | 99.99745 | 99.99987 | 99.99687 | 99.93161 | 99.94919 | 99.99904 | 99.922 |
| 7.506 | 99.14833 | 99.63667 | 99.9025 | 99.97977 | 99.99749 | 99.99987 | 99.99696 | 99.93308 | 99.95013 | 99.99905 | 99.92346 |
| 7.5802 | 99.69588 | 99.64407 | 99.90454 | 99.98013 | 99.99753 | 99.99987 | 99.99704 | 99.93451 | 99.95106 | 99.99907 | 99.92489 |
| 7.6544 | 99.11996 | 99.65125 | 99.90652 | 99.98047 | 99.99757 | 99.99987 | 99.99712 | 99.93588 | 99.95195 | 99.99908 | 99.92628 |
| 7.7286 | 99.21075 | 99.6582 | 99.90844 | 99.9808 | 99.9976 | 99.99987 | 99.99719 | 99.93723 | 99.95282 | 99.99909 | 99.92762 |
| 7.8028 | 99.57673 | 99.66496 | 99.91029 | 99.98112 | 99.99764 | 99.99988 | 99.99727 | 99.93852 | 99.95367 | 99.99911 | 99.92893 |
| 7.877 | 100.0978 | 99.67151 | 99.9121 | 99.98143 | 99.99767 | 99.99988 | 99.99734 | 99.93977 | 99.95449 | 99.99912 | 99.93021 |
| 7.9512 | 99.6486 | 99.67786 | 99.91384 | 99.98173 | 99.9977 | 99.99987 | 99.9974 | 99.94099 | 99.95529 | 99.99912 | 99.93144 |
| 8.0254 | 99.61645 | 99.68404 | 99.91554 | 99.98203 | 99.99773 | 99.99987 | 99.99746 | 99.94217 | 99.95607 | 99.99914 | 99.93266 |
| 8.0996 | 100.1101 | 99.69005 | 99.91719 | 99.98232 | 99.99776 | 99.99987 | 99.99752 | 99.94331 | 99.95683 | 99.99915 | 99.93383 |
| 8.1738 | 100.0146 | 99.69588 | 99.91879 | 99.9826 | 99.9978 | 99.99987 | 99.99758 | 99.94443 | 99.95757 | 99.99916 | 99.93497 |
| 8.248 | 99.08024 | 99.70154 | 99.92035 | 99.98289 | 99.99783 | 99.99987 | 99.99764 | 99.94551 | 99.9583 | 99.99918 | 99.9361 |
| 8.3222 | 99.66562 | 99.70705 | 99.92186 | 99.98315 | 99.99786 | 99.99988 | 99.9977 | 99.94656 | 99.95901 | 99.99918 | 99.93718 |
| 8.3964 | 99.8226 | 99.71241 | 99.92332 | 99.98342 | 99.99789 | 99.99988 | 99.99775 | 99.94758 | 99.95969 | 99.99919 | 99.93825 |
| 8.4706 | 99.38191 | 99.71762 | 99.92476 | 99.98368 | 99.99792 | 99.99988 | 99.9978 | 99.94857 | 99.96036 | 99.99921 | 99.93928 |
| 8.5448 | 100.2028 | 99.72269 | 99.92615 | 99.98393 | 99.99795 | 99.99988 | 99.99785 | 99.94953 | 99.96101 | 99.99921 | 99.94029 |
| 8.619 | 99.88313 | 99.72762 | 99.9275 | 99.98418 | 99.99797 | 99.99988 | 99.9979 | 99.95047 | 99.96165 | 99.99923 | 99.94128 |
| 8.6932 | 99.69494 | 99.73242 | 99.92881 | 99.98442 | 99.998 | 99.99988 | 99.99795 | 99.95139 | 99.96227 | 99.99924 | 99.94224 |
| 8.7674 | 99.94649 | 99.7371 | 99.93009 | 99.98466 | 99.99802 | 99.99988 | 99.99799 | 99.95227 | 99.96288 | 99.99924 | 99.94317 |
| 8.8416 | 99.61361 | 99.74166 | 99.93134 | 99.98489 | 99.99805 | 99.99988 | 99.99803 | 99.95313 | 99.96348 | 99.99926 | 99.94408 |
| 8.9158 | 100.0534 | 99.74609 | 99.93255 | 99.98511 | 99.99808 | 99.99989 | 99.99808 | 99.95397 | 99.96405 | 99.99927 | 99.94498 |
| 8.99 | 99.77721 | 99.75042 | 99.93373 | 99.98533 | 99.99811 | 99.99989 | 99.99812 | 99.95479 | 99.96461 | 99.99928 | 99.94585 |
| 9.0642 | 100.0373 | 99.75463 | 99.93488 | 99.98555 | 99.99813 | 99.99989 | 99.99816 | 99.95558 | 99.96517 | 99.99928 | 99.9467 |
| 9.1384 | 99.30153 | 99.75874 | 99.936 | 99.98576 | 99.99815 | 99.99989 | 99.9982 | 99.95636 | 99.96571 | 99.99929 | 99.94753 |
| 9.2126 | 100.4723 | 99.76274 | 99.93709 | 99.98596 | 99.99818 | 99.99989 | 99.99823 | 99.95712 | 99.96624 | 99.99931 | 99.94834 |
| 9.2868 | 100.1971 | 99.76665 | 99.93816 | 99.98617 | 99.9982 | 99.99989 | 99.99827 | 99.95785 | 99.96675 | 99.99931 | 99.94913 |
| 9.361 | 100.1243 | 99.77045 | 99.93919 | 99.98636 | 99.99821 | 99.99988 | 99.9983 | 99.95856 | 99.96725 | 99.99931 | 99.94991 |
| 9.4352 | 99.60604 | 99.77417 | 99.94019 | 99.98655 | 99.99824 | 99.99988 | 99.99833 | 99.95926 | 99.96774 | 99.99932 | 99.95066 |
| 9.5094 | 99.92852 | 99.77779 | 99.94118 | 99.98674 | 99.99826 | 99.99988 | 99.99836 | 99.95994 | 99.96822 | 99.99933 | 99.9514 |
| 9.5836 | 99.48026 | 99.78133 | 99.94215 | 99.98692 | 99.99828 | 99.99989 | 99.9984 | 99.9606 | 99.96869 | 99.99934 | 99.95213 |
