# Supplementary material for: Synthesis, characterization of an AlPO-CJ2analogue containing heteroatomic Eu
Source: Royal Society of Chemistry journal article supplement (doi:10.1039/b205254g), 2002-01-01
Supplement: b205254g4.doc [file b205254g4.doc]

**XRD identification.** The as-synthesized crystalline samples were identified on a Rigaku D/max rB diffractometer using Cu-K radiation (0.15418 nm). The range of scan angle was 5 to 35/(2) with a scanning speed of 4/(2) per min.

**SEM.** Scanning electron microscopy images of the synthesized samples were taken with a Philips XL 30 scanning electron microscope.

**Element analysis.** The chemical compositions of the samples prepared were determined with inductively coupled plasma emission spectroscopy (ICP) on a HATACHI T-4010 spectrometer. Eu2O3 was chosen as a reference. The samples analyzed were prepared by dissolution in concentrated nitric acid.

**Mössbauer spectra**. The Mössbauer spectrum of Sample SEu was recorded at 77 K on a constant acceleration Mössbauer spectrometer with a source of 151Eu in Eumatrix. The isomer shift of 151Eu of SEu was given relative to a reference sample of EuF3. This spectrum was measured in Physics Department of Nanjing University.

**27Al and 31P MAS NMR**. 27Al, 31P magic angle spinning (MAS) NMR spectra of Sample SAP and Sample SEu were collected at room temperature (298 K) on a Brucker DSX-300 spectrometer. The detail experimental acquisition conditions are listed in Table .

**Luminescent spectroscopy.** The luminescence spectra of Sample SEu and a reference sample containing pure Eu2O3 were recorded on a HATACHI-MPE-4 with 150 W Xe lamp.

Table . MAS NMR One Pulse Acquisition Conditions On Bruker DSX-300 Spectrometer

|  | **27Al** | **31P** |
| --- | --- | --- |
| Pulse length | 0.5  sec | 2.5  sec |
| **Dead time** | 0.5  sec | 0.5  sec |
| **Recycle time** | 0.8 s | 60 s |
| **Resonance frequency** | 78.2 MHz | 121.5 MHz |
| **Spectral width** | 47 kHz | 72 kHz |
| **MAS spinning speed** | 10 K | 10 K |
| **Number of scans** | 4800 | 32 |
| **Number of digitalized points** | 1024 | 4096 |
| **Referening 0 ppm** | AlCl3 | H3PO4 85% |
