# Supplementary material for: Synthesis, characterization of an AlPO-CJ2analogue containing heteroatomic Eu
Source: Royal Society of Chemistry journal article supplement (doi:10.1039/b205254g), 2002-01-01
Supplement: b205254g5.doc [file b205254g5.doc]

The synthesis of Sample SEu

In a typical preparation, 1.289 g pseudobohmite alumina,, 0.176 g europium oxide (Eu2O3 content: 99.99 wt%), 0.370 g ammonium fluoride and 0.601 g carbamide, and 12.600 g distilled water were mixed together to form a mixture. Then 1.153 g phosphate acid was dropped into the mixture under vigorous stirring. A homogeneous gel of the reactant mixture was formed after stirring for 24 hours. The crystalline product of Sample SEu was formed at 170℃ for 3 days in 15 ml stainless autoclaves lined with Teflon. The crystalline product was washed with distilled water for several times until no suspended substance remained. Moreover, the products were washed with cool dilute nitric acid for removing unreacted Eu2O3 and then dried at 100 C for 1 hour.

Sample SEu can be perpared in tripropylamine-NH4F-Eu2O3-Al2O3-P2O5-H2O reactant system. But the obtaining of products phase is difficult to control. With the changing of amount of ammonium fluoride and reactive time, AlPO-CJ2, AlPO-5 phases can be obtained, respectively.
