# Supplementary figures and images for: Synthesis, characterization of an AlPO-CJ2analogue containing heteroatomic Eu
Source: Royal Society of Chemistry journal article supplement (doi:10.1039/b205254g), 2002-01-01

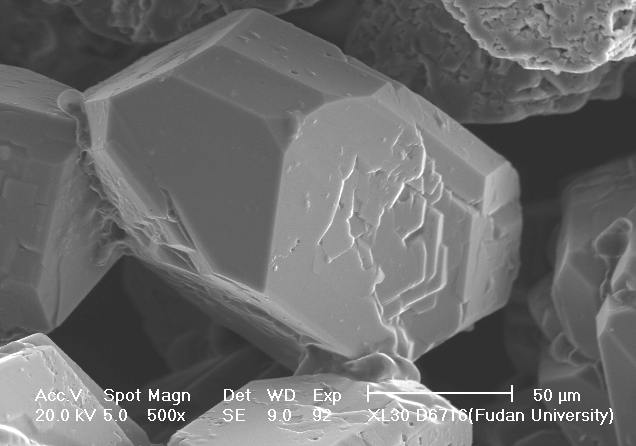

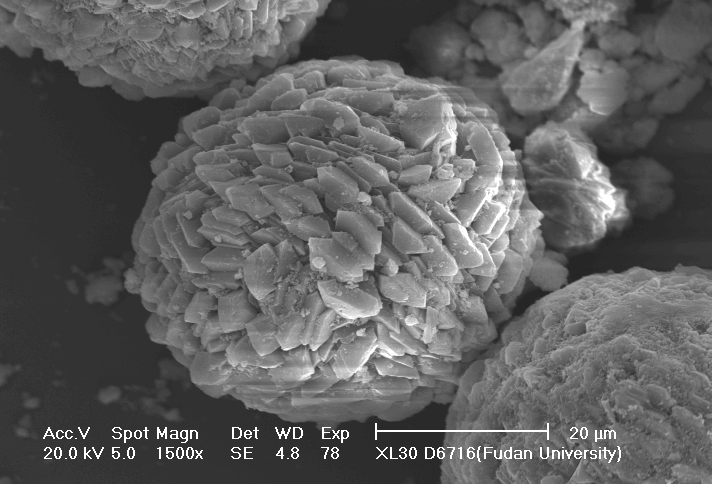
 a b

SEM photographs of Sample **AlPO-CJ2**, and Sample **SEu** (b).

Supplement: b205254g1.doc [file b205254g1.doc]

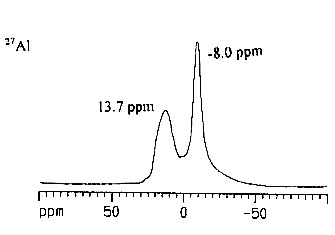


27 Al MAS NMR spectrum for Sample SEu.

The chemical shift of Al(V) is at 13.7 ppm and Al(VI)

is at –8.0 ppm.

Supplement: b205254g3.doc [file b205254g3.doc]
